# Supplementary figures and images for: Preparation and Characterization of Ecofriendly food Packaging Material by Smooth Hound Skin Gelatin Films/TiO2
Source: Research Square preprint supplement (doi:10.21203/rs.3.rs-1239574/v1), 2022-02-15

**Graphical abstract
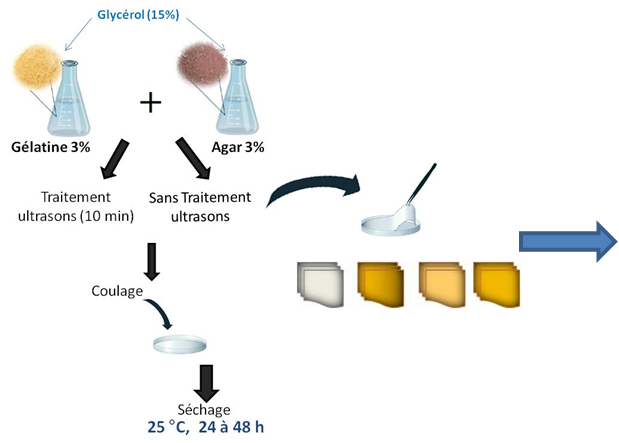
**

Supplement: Supplementary file 1 [file c946a9be38638f5c8a43591b.docx]
